# Supplementary material for: snpAD: an ancient DNA genotype caller
Source: Oxford University Press journal article supplement (doi:10.1093/bioinformatics/bty507), 2018-06-19
Supplement: bioinformatics_34_24_4165_s1.pdf [file bioinformatics_34_24_4165_s1.pdf]

# snpAD: an ancient DNA genotyper

## Supplementary Tables and Figures

June 19, 2018

### Contents

|          |                                                 |           |
|----------|-------------------------------------------------|-----------|
| <b>1</b> | <b>Figures</b>                                  | <b>4</b>  |
| <b>2</b> | <b>Tables</b>                                   | <b>17</b> |
| <b>3</b> | <b>Comparison to GATK and samtools</b>          | <b>32</b> |
| 3.1      | Altai Neandertal Chromosome 21 . . . . .        | 32        |
| 3.2      | Vindja 33.19 Neandertal Chromosome 21 . . . . . | 34        |
| <b>4</b> | <b>Comparison to ATLAS</b>                      | <b>35</b> |

## List of Figures

|    |                                                                                                         |    |
|----|---------------------------------------------------------------------------------------------------------|----|
| 1  | Schematic description of default error model . . . . .                                                  | 4  |
| 2  | Histogram of quality scores in ancient samples . . . . .                                                | 5  |
| 3  | Effect of quality score filtering on pairwise sequence divergence for ancient samples . . . . .         | 6  |
| 4  | Runtime for simulated datasets . . . . .                                                                | 7  |
| 5  | Memory usage with simulated datasets . . . . .                                                          | 8  |
| 6  | Error estimates for Vindija 33.19 data on chromosome 21 . . . . .                                       | 9  |
| 7  | Discordant genotype calls in Vindija 33.19 subsamples compared to the full 30x coverage calls . . . . . | 10 |
| 8  | Classification of discordant genotype calls in Vindija 33.19 subsamples . . . . .                       | 11 |
| 9  | Classification of discordant genotype calls in Vindija 33.19 subsamples (GQ30) . . . . .                | 12 |
| 10 | Classification of discordant genotype calls in Vindija 33.19 subsamples (GQ50) . . . . .                | 13 |
| 11 | Expected proportion of sites with at least 4-fold coverage in low-coverage genomes . . . . .            | 14 |
| 12 | Damage patterns in single stranded libraries . . . . .                                                  | 15 |
| 13 | Damage patterns in double stranded libraries . . . . .                                                  | 16 |

## List of Tables

|    |                                                                                                      |    |
|----|------------------------------------------------------------------------------------------------------|----|
| 1  | Datasets used in this study . . . . .                                                                | 17 |
| 2  | Simulated genotype frequencies . . . . .                                                             | 17 |
| 3  | Estimated genotype frequencies from simulations . . . . .                                            | 18 |
| 4  | Estimates from 100M simulated sites at exactly 3-fold coverage . . . . .                             | 18 |
| 5  | Genotype frequency estimates for 3x simulated coverage when true error rates are given . . . . .     | 18 |
| 6  | Genotype frequency estimates for simulations with 1-3x with a poisson distributed coverage . . . . . | 19 |
| 7  | Simulated genotype frequencies with reference bias . . . . .                                         | 19 |
| 8  | Estimated genotype frequencies and reference bias from simulations with reference bias . . . . .     | 20 |
| 9  | Estimated genotype frequencies and reference bias from simulations without reference bias . . . . .  | 21 |
| 10 | Vindija 33.19: previous and new genotype frequency estimates for 30x chromosome 21 . . . . .         | 22 |
| 11 | Estimated genotype frequencies for subsampled Vindija 33.19 data . . . . .                           | 22 |

|    |                                                                                                          |    |
|----|----------------------------------------------------------------------------------------------------------|----|
| 12 | Estimated genotype frequencies for subsampled Vindija 33.19 data with reference bias . . . . .           | 23 |
| 13 | Comparison of called genotypes in Vindija 33.19 subsamples to 30x calls. . . . .                         | 24 |
| 14 | Comparison of called genotypes at GQ30 in Vindija 33.19 subsamples to 30x calls. . . . .                 | 25 |
| 15 | Comparison of called genotypes at GQ50 in Vindija 33.19 subsamples to 30x calls. . . . .                 | 26 |
| 16 | Vindija 33.15: genotype frequency estimates with and without reference bias . . . . .                    | 27 |
| 17 | Comparison of Vindija 33.19 and 33.15 chr21 genotypes with and without reference bias . . . . .          | 28 |
| 18 | Genotype frequencies for subsampled Vindija 33.19 data restricting to at least 4-fold coverage . . . . . | 29 |
| 19 | Genotype frequencies for low-coverage archaic and modern humans with at least 4-fold coverage . . . . .  | 30 |
| 20 | ATLAS' genome-wide estimates of $\theta$ for Motala12 . . . . .                                          | 31 |
| 21 | GATK and samtools vs. snpAD heterozygous calls on Altai chromosome 21 . . . . .                          | 33 |
| 22 | GATK and samtools vs. snpAD heterozygous calls on Vindija 33.19 chromosome 21 . . . . .                  | 34 |

# 1 Figures

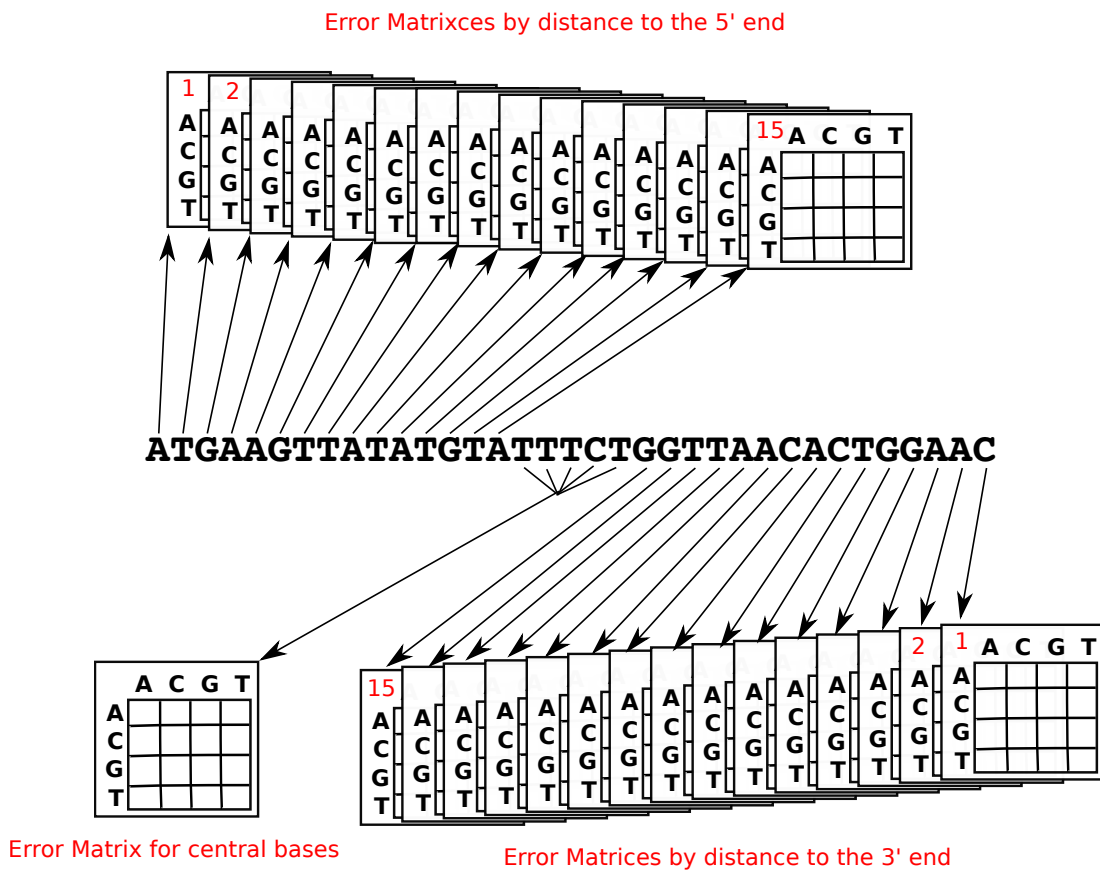

Figure 1: Schematic description of default error model. The first 15 and last 15 bases of each sequence are represented by separate base substitution matrices. Bases in the interior are assigned to a 31<sup>st</sup> matrix. This schema is expected to capture differences in substitution probabilities caused by ancient DNA damage (see e.g. Figs.12 and 13).

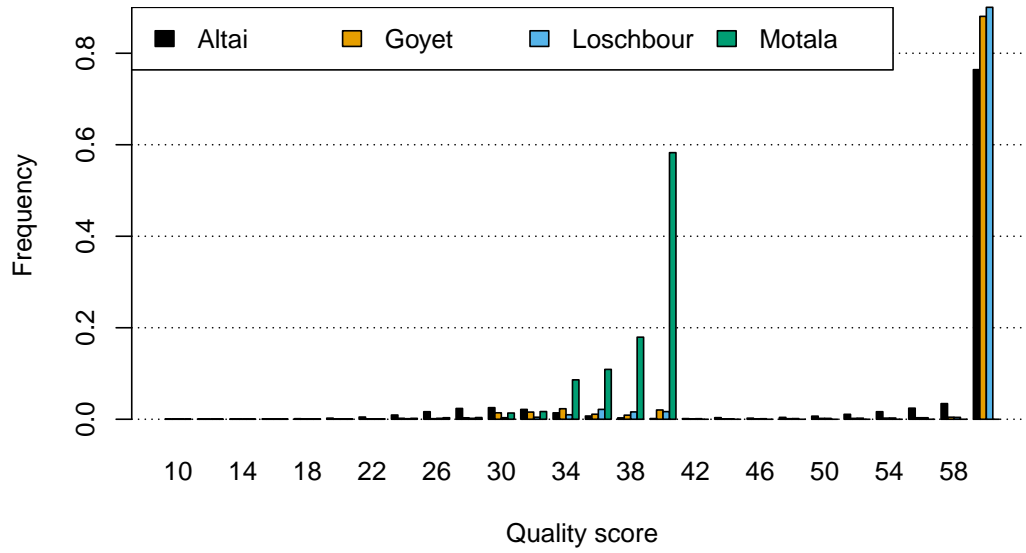

Figure 2: Histogram of quality scores in ancient samples: The majority of bases are of high-quality ( $Q \geq 30$ ). See Table 1 for a description of the samples. Note that the maximum quality score is 40 in the Motala12 data and 60 for all other samples.

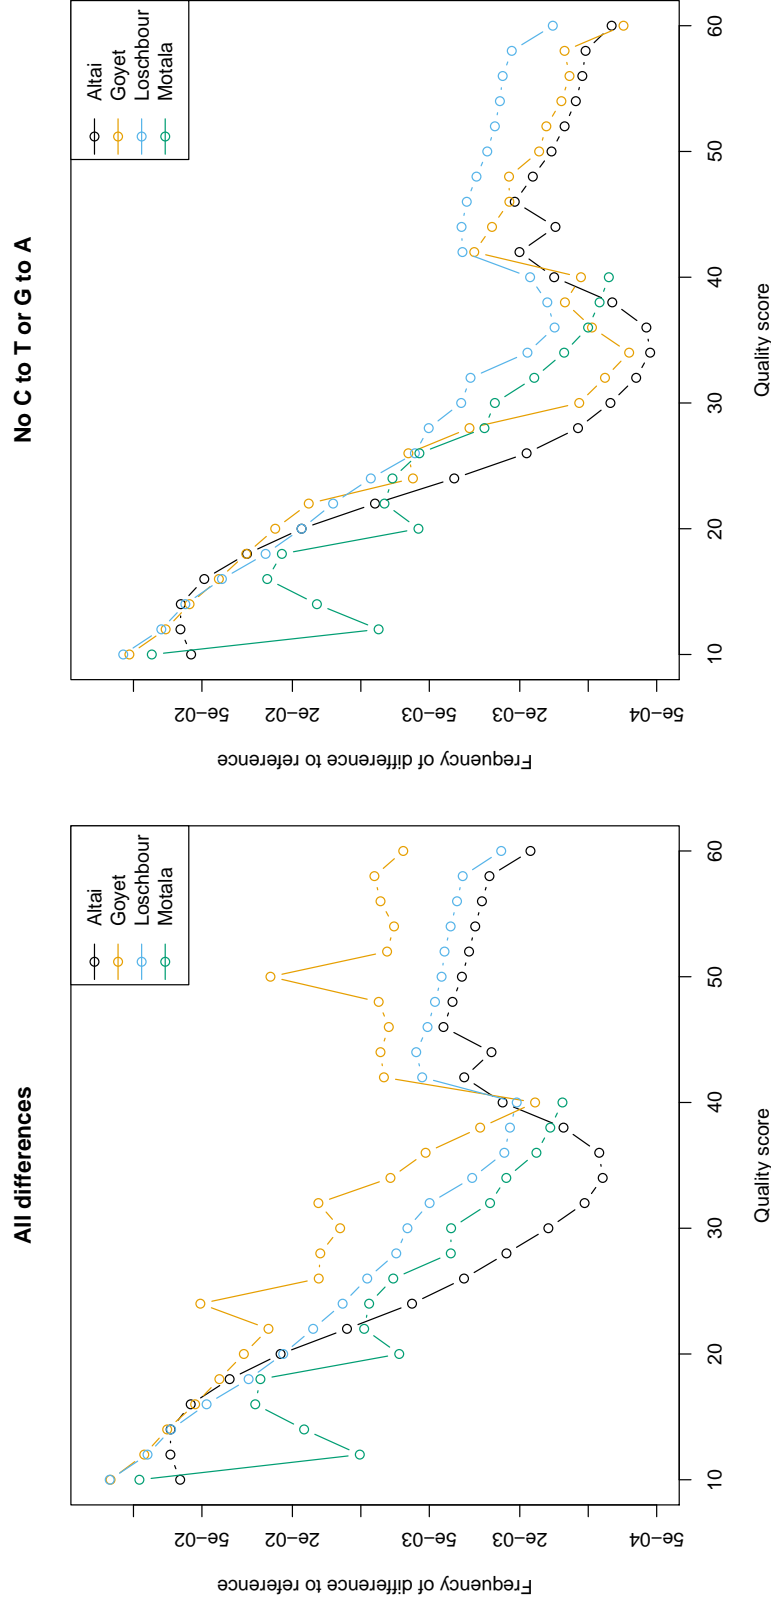

Figure 3: Effect of quality score filtering on pairwise sequence divergence for ancient samples. Shown are the average number of mismatching bases to a reference genome for all substitutions (left) and for any substitution, except for reference C to sample T or reference G to sample A (right). Note that the y-scale is on a log scale, and that increasing quality scores are expected to produce a linear decrease on that scale. The Altai and Goyet Neandertal samples were compared to the Altai genotype calls excluding heterozygous positions. Loschbour and Motala were compared to the human genome hg19. Analysis was restricted to chromosome 1 for low-coverage and chromosome 21 for high-coverage samples. See Supplementary Figure S7 in [Prüfer et al. \(2017\)](#) for a similar analysis of Vindija 33.19.

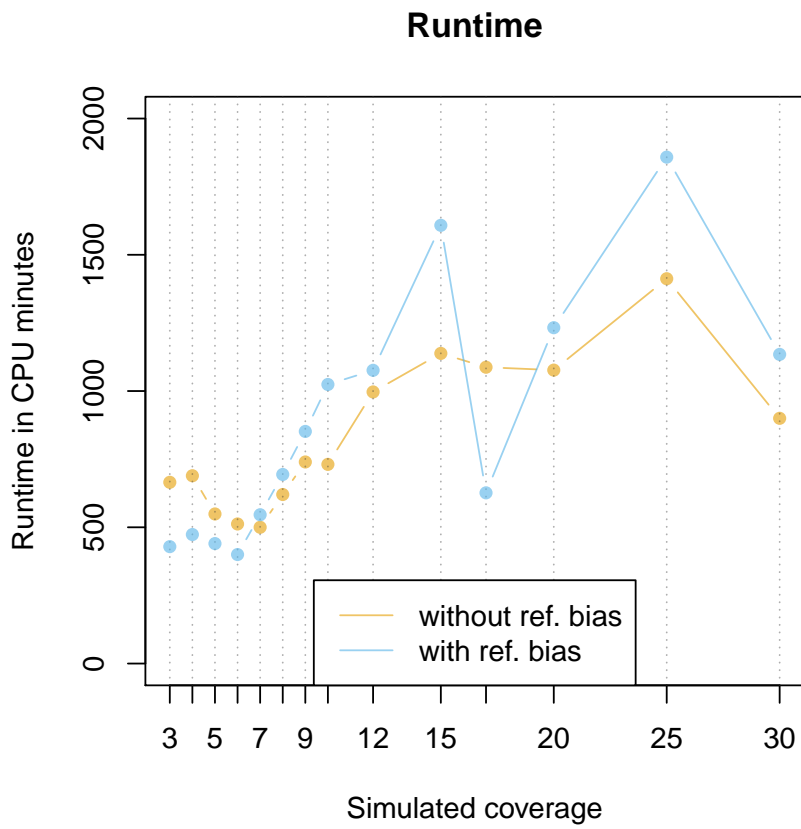

Figure 4: Runtime in CPU minutes for estimates with and without reference bias on simulated datasets. Wall clock time ranged from 23 to 83 minutes parallelizing over 30 cores of a multi-core Intel Xeon server.

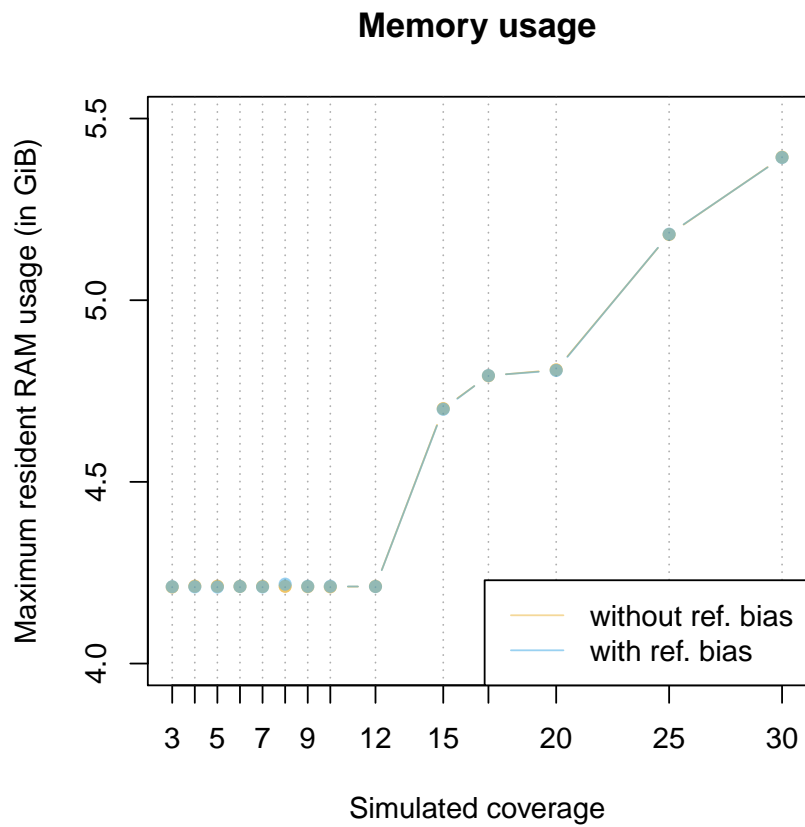

Figure 5: Maximum RAM usage in GiB during estimation of parameters with and without reference bias on simulated datasets. Note that the estimates overlap almost perfectly between the runs with and without reference bias so that points appear in light gray. Y-axis starts at 4GiB.



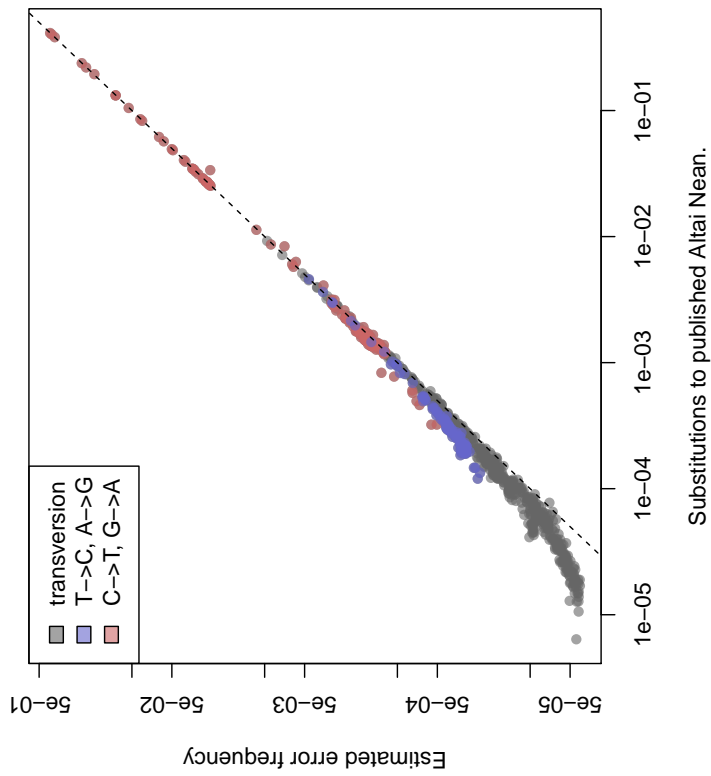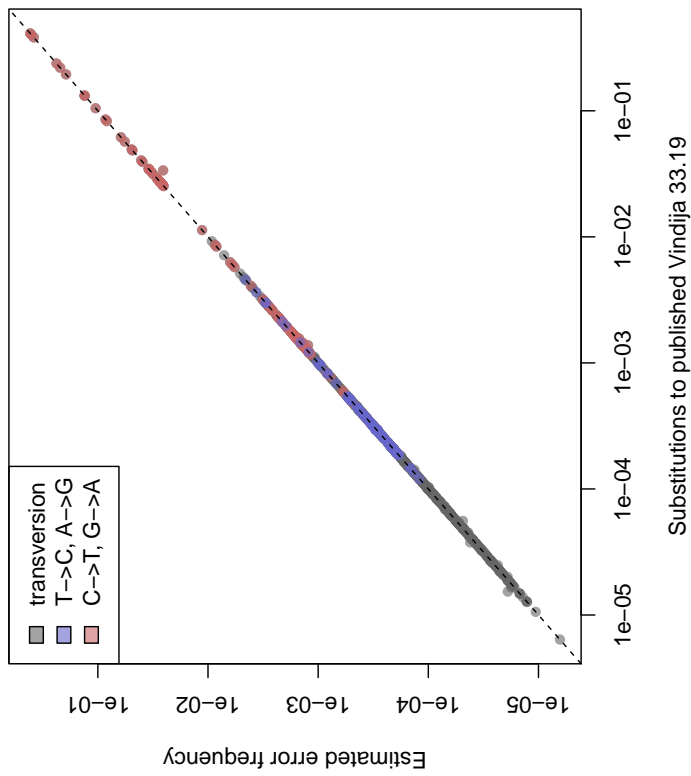

Figure 6: Error estimates for Vindija 33.19 data on chromosome 21. Left: Error estimates compared to substitutions of the Vindija 33.19 sequences to the previously published Vindija 33.19 genotypes. Right: Error estimates compared to substitutions of the data to the Altai Neandertal genotypes.

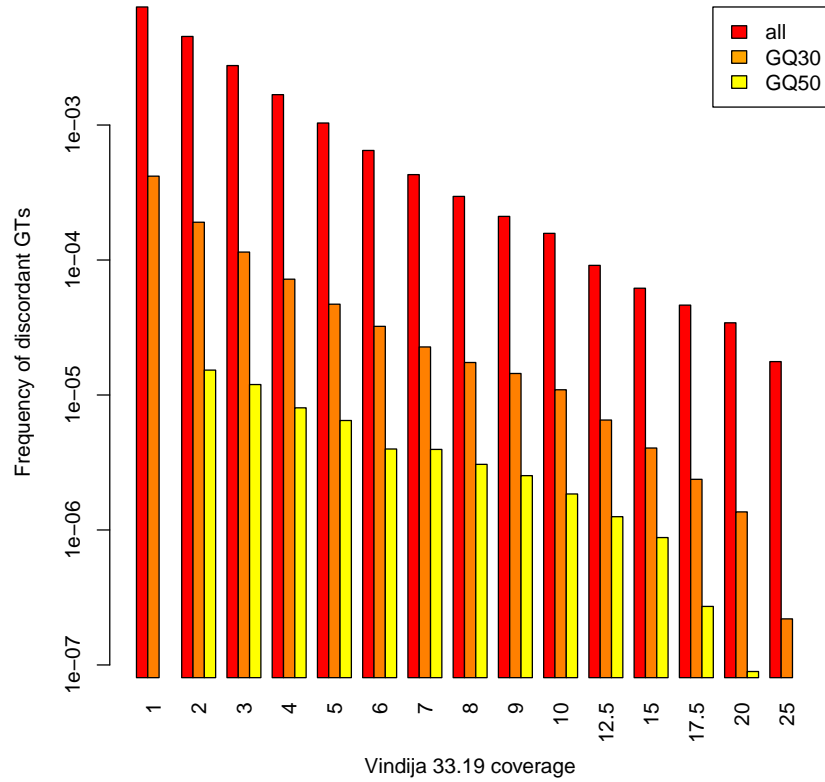

Figure 7: Discordant genotype calls in Vindija 33.19 subsamples compared to the full 30x coverage calls. Frequency of discordant genotypes is on a log-scale. Colors indicate whether all genotypes were considered, or only those with a genotype quality  $>30$  or  $>50$ .

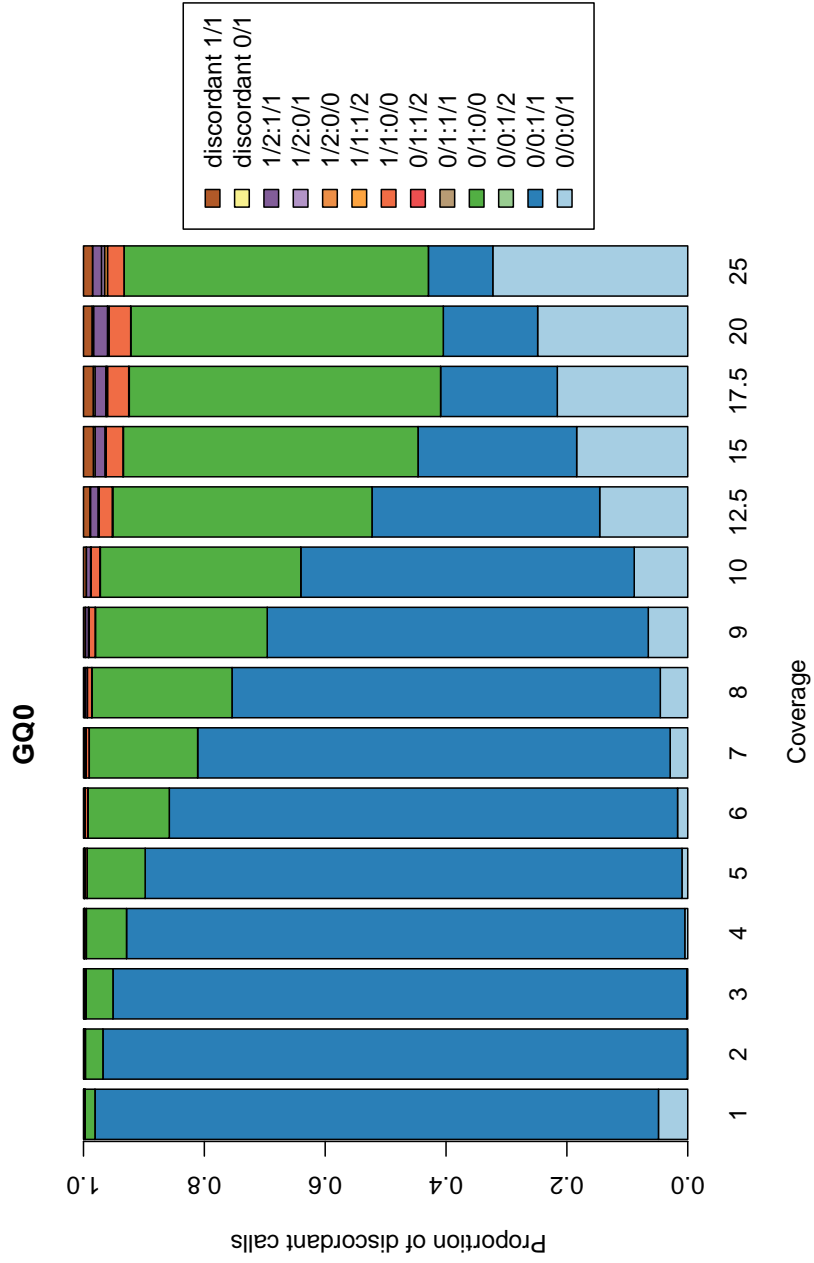

Figure 8: Classification of discordant genotype calls in Vindija 33.19 subsamples. No genotype quality cutoff was applied. For counts see Table 13. Legend shows genotypes in order 30x:subsample.

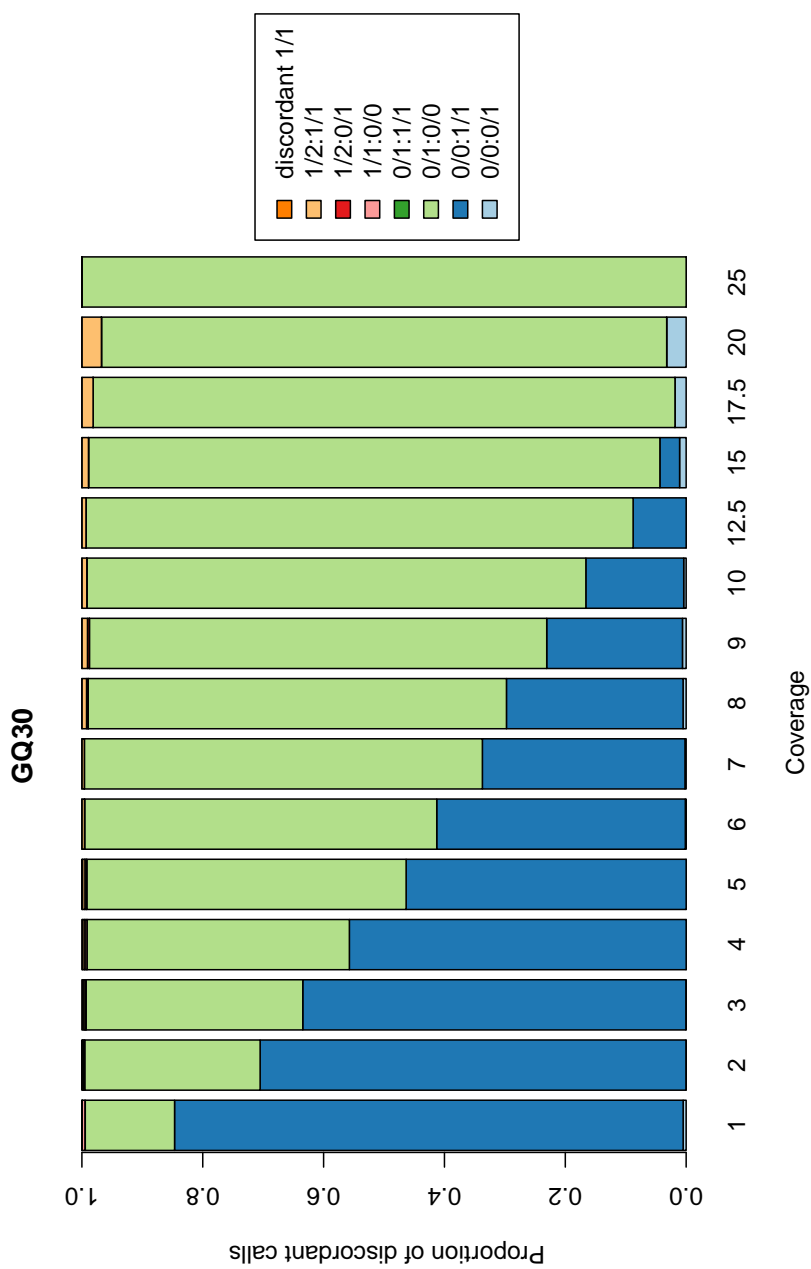

Figure 9: Classification of discordant genotype calls in Vindija 33.19 subsamples. A genotype quality cutoff of  $\geq 30$  was applied. For counts see Table 13. Legend shows genotypes in order 30x:subsample.

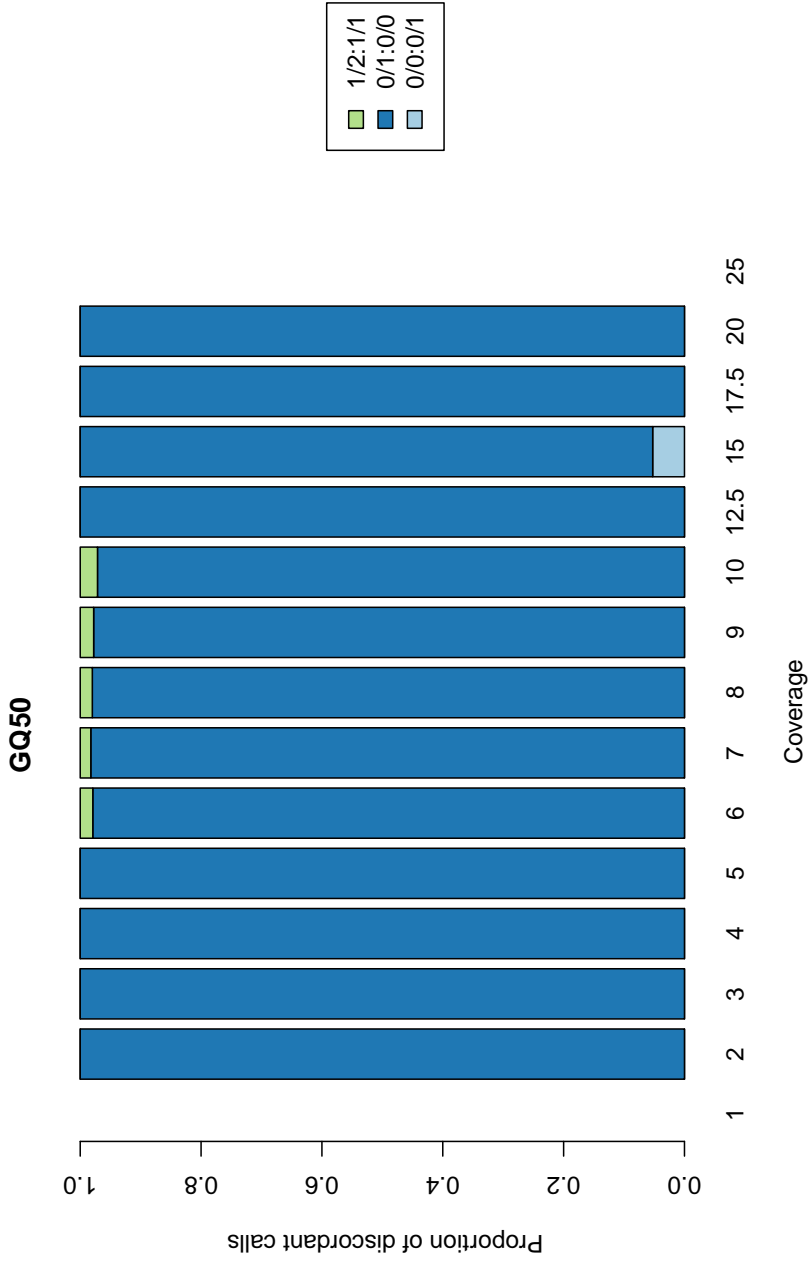

Figure 10: Classification of discordant genotype calls in Vindija 33.19 subsamples. A genotype quality cutoff of  $\geq 50$  was applied. No discordant calls were observed for coverage 1 and 25. For counts see Table 13. Legend shows genotypes in order 30x:subsampling.

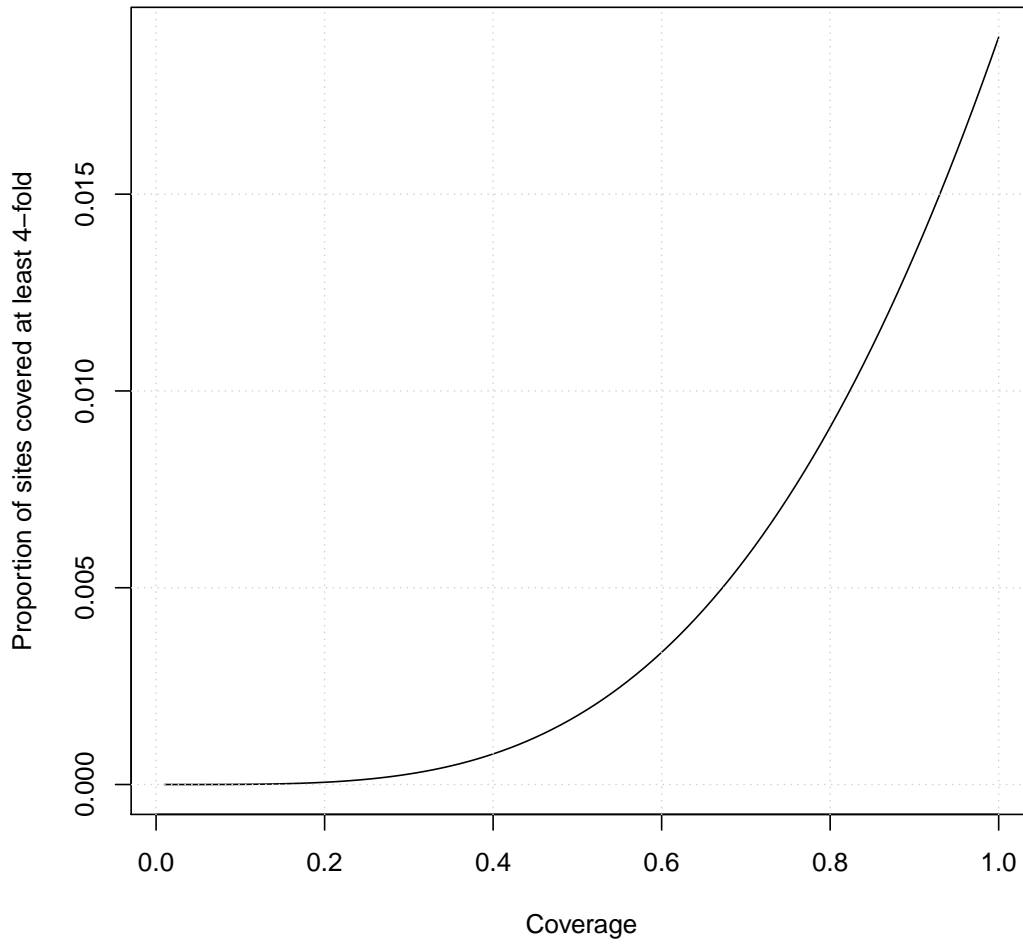

Figure 11: Expected proportion of sites with at least 4-fold coverage in low-coverage genomes according to the Lander-Waterman statistics.

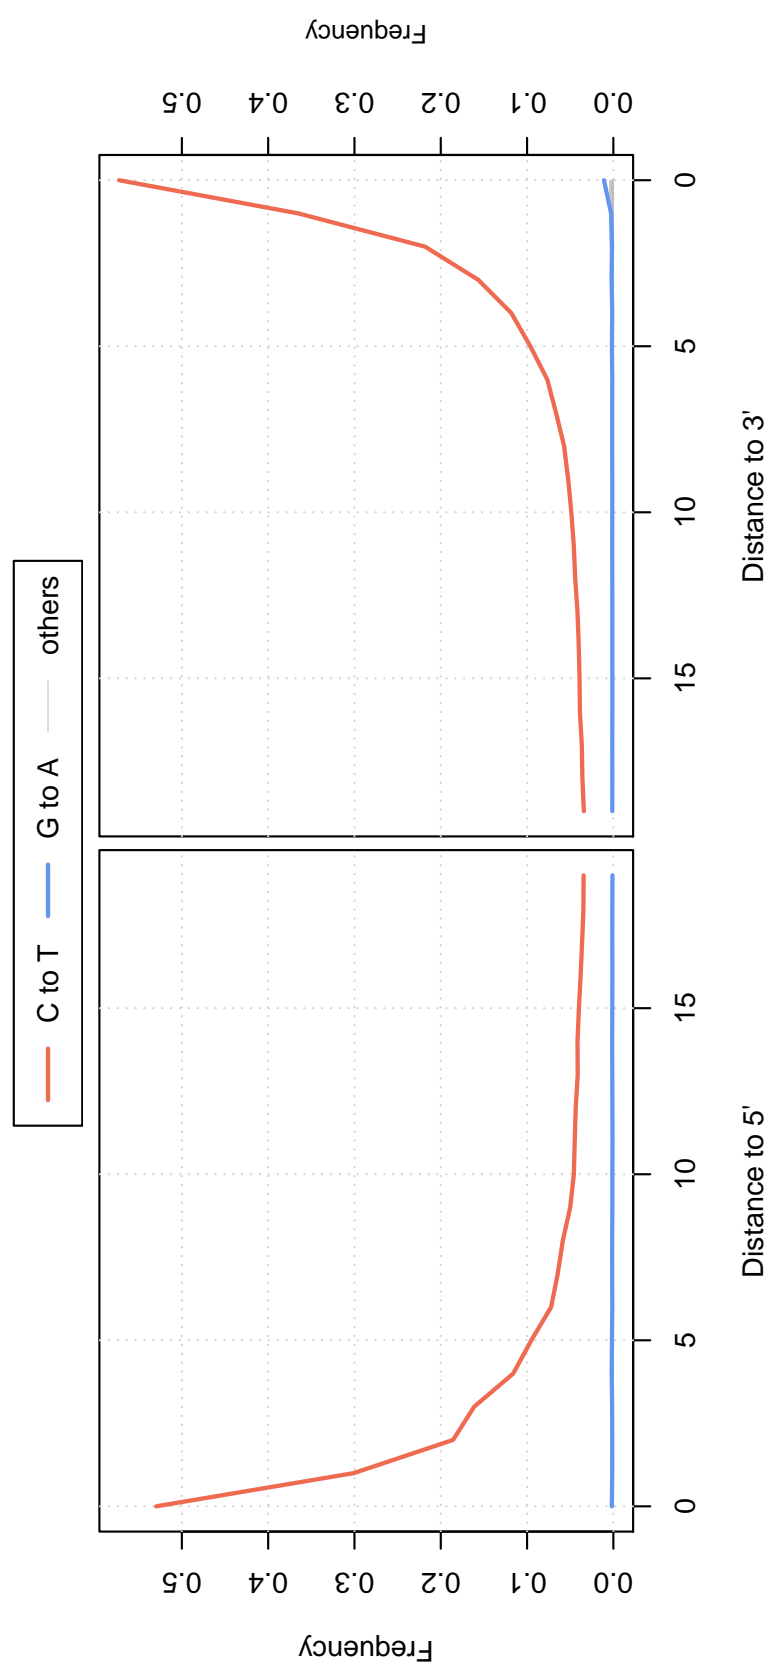

Figure 12: Damage patterns in the Vindija 87 Neandertal data prepared with a single stranded library protocol.

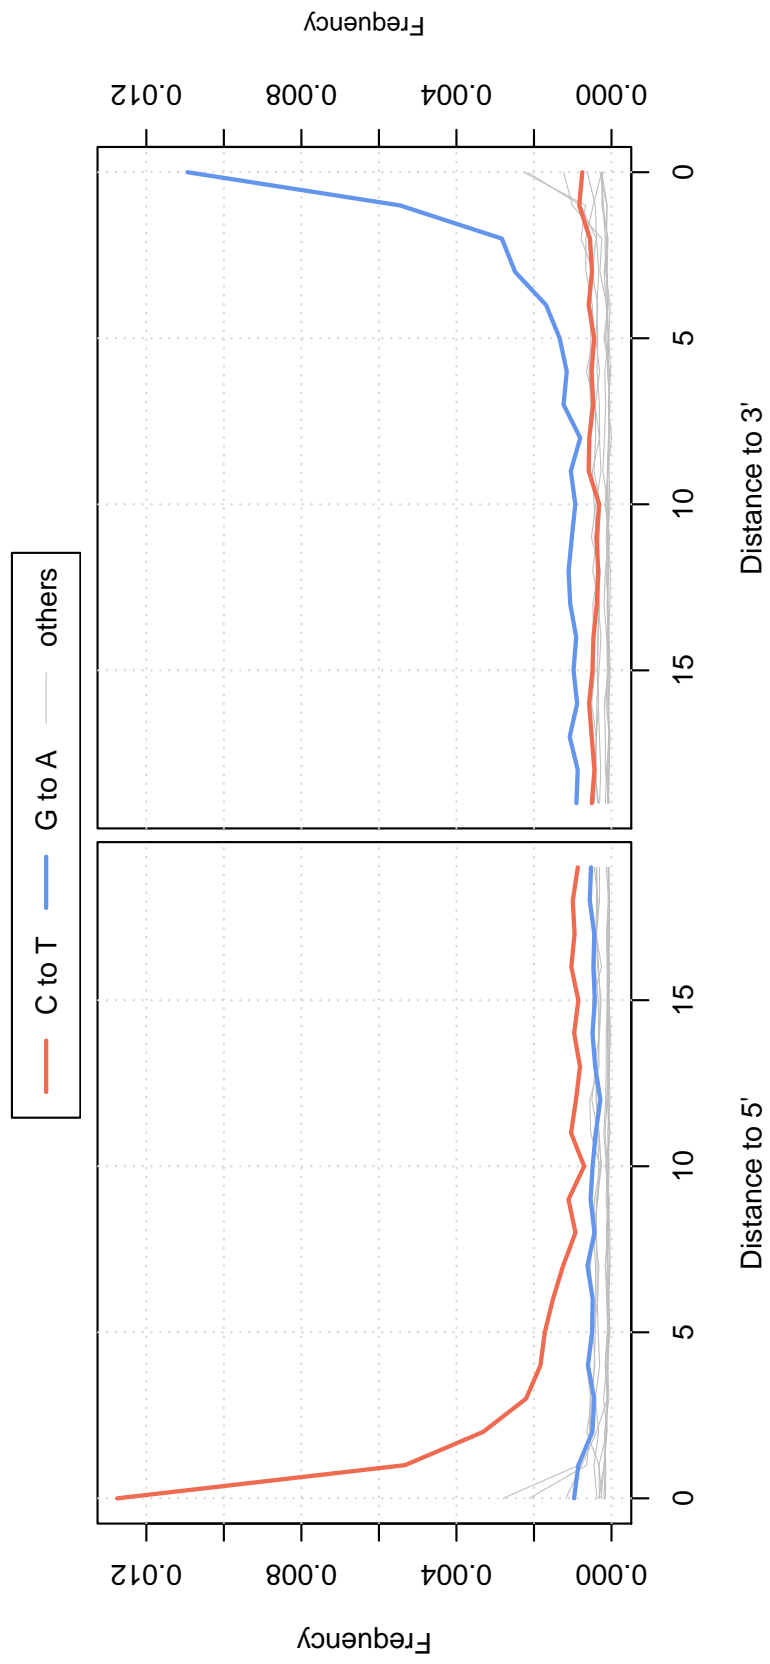

Figure 13: Damage patterns in the data of the European hunter-gatherer Motala12 prepared with a double stranded library protocol.



## 2 Tables

| Group        | Name                       | Coverage | Reference                                      |
|--------------|----------------------------|----------|------------------------------------------------|
| Neandertal   | Altai (from Denisova cave) | 52x      | <a href="#">Prüfer <i>et al.</i> (2014)</a>    |
| Neandertal   | Vindija 33.19              | 30x      | <a href="#">Prüfer <i>et al.</i> (2017)</a>    |
| Modern human | Loschbour                  | 22x      | <a href="#">Lazaridis <i>et al.</i> (2014)</a> |
| Neandertal   | Les Cottés Z4-1514         | 2.7x     | <a href="#">Hajdinjak <i>et al.</i> (2018)</a> |
| Modern human | Motala 12                  | 2.4x     | <a href="#">Lazaridis <i>et al.</i> (2014)</a> |
| Neandertal   | Goyet Q56-1                | 2.2x     | <a href="#">Hajdinjak <i>et al.</i> (2018)</a> |
| Neandertal   | Mezmaiskaya 2              | 1.7x     | <a href="#">Hajdinjak <i>et al.</i> (2018)</a> |
| Neandertal   | Vindija 87                 | 1.3x     | <a href="#">Hajdinjak <i>et al.</i> (2018)</a> |
| Neandertal   | Spy 94a                    | 1.0x     | <a href="#">Hajdinjak <i>et al.</i> (2018)</a> |

Table 1: Datasets used in this study.

| Cov. | AC     | AG     | AT     | CG     | CT     | GT     |
|------|--------|--------|--------|--------|--------|--------|
| 3    | 0.0994 | 0.193  | 0.0979 | 0.0958 | 0.197  | 0.0977 |
| 4    | 0.0983 | 0.2045 | 0.1008 | 0.0977 | 0.2074 | 0.1056 |
| 5    | 0.0987 | 0.2035 | 0.105  | 0.1006 | 0.2051 | 0.092  |
| 6    | 0.1001 | 0.1973 | 0.1002 | 0.103  | 0.2035 | 0.0975 |
| 7    | 0.0998 | 0.2004 | 0.1001 | 0.1024 | 0.2083 | 0.1037 |
| 8    | 0.103  | 0.1964 | 0.1007 | 0.1014 | 0.1985 | 0.0961 |
| 9    | 0.0966 | 0.2057 | 0.0916 | 0.0972 | 0.1986 | 0.095  |
| 10   | 0.1039 | 0.1952 | 0.096  | 0.1    | 0.2053 | 0.1003 |
| 12   | 0.1051 | 0.2022 | 0.1    | 0.0949 | 0.2033 | 0.0989 |
| 15   | 0.0994 | 0.1985 | 0.1009 | 0.099  | 0.2003 | 0.1027 |
| 17   | 0.1014 | 0.2019 | 0.0992 | 0.0993 | 0.2026 | 0.0964 |
| 20   | 0.099  | 0.1939 | 0.1018 | 0.0998 | 0.2012 | 0.1031 |
| 25   | 0.1045 | 0.2009 | 0.0971 | 0.0964 | 0.2007 | 0.0986 |
| 30   | 0.0976 | 0.2051 | 0.1019 | 0.0974 | 0.2011 | 0.0976 |

Table 2: Simulated genotype frequencies (per 1000bp). Deviation from specified parameters are due to the use of a pseudo random number generator during simulation.

| Cov. | AC        | AG       | AT        | CG        | CT       | GT        |
|------|-----------|----------|-----------|-----------|----------|-----------|
| 3    | 0.141943  | 0.487617 | 0.132684  | 0.217547  | 0.518872 | 0.145262  |
| 4    | 0.0978802 | 0.217037 | 0.106058  | 0.103366  | 0.207338 | 0.107778  |
| 5    | 0.0977911 | 0.19909  | 0.102525  | 0.0982538 | 0.213814 | 0.0922814 |
| 6    | 0.0982396 | 0.2003   | 0.100129  | 0.100975  | 0.2039   | 0.0957835 |
| 7    | 0.0994662 | 0.205249 | 0.099413  | 0.101335  | 0.211202 | 0.102465  |
| 8    | 0.102891  | 0.202079 | 0.100336  | 0.101366  | 0.195546 | 0.0962143 |
| 9    | 0.0961095 | 0.201015 | 0.0916744 | 0.0967756 | 0.198276 | 0.0956978 |
| 10   | 0.102898  | 0.195699 | 0.0955418 | 0.10141   | 0.209569 | 0.100444  |
| 12   | 0.105482  | 0.200895 | 0.100301  | 0.0951686 | 0.204228 | 0.0986684 |
| 15   | 0.0998465 | 0.199688 | 0.100235  | 0.0986095 | 0.199992 | 0.10304   |
| 17   | 0.101299  | 0.202168 | 0.0993153 | 0.0990021 | 0.201701 | 0.0962989 |
| 20   | 0.0985454 | 0.194164 | 0.101311  | 0.099694  | 0.200358 | 0.103154  |
| 25   | 0.104501  | 0.200799 | 0.0970826 | 0.0963994 | 0.200622 | 0.0985396 |
| 30   | 0.0976482 | 0.20494  | 0.101913  | 0.0973725 | 0.201186 | 0.0976336 |

Table 3: Estimated genotype frequencies (per 1000bp) from simulations (see Table 2).

| Genotype | Simulated freq. | Estimated freq. | Exp-Obs/Exp |
|----------|-----------------|-----------------|-------------|
| AC       | 0.10027         | 0.132199        | -0.318      |
| AG       | 0.19781         | 0.242159        | -0.224      |
| AT       | 0.10025         | 0.020440        | 0.7961      |
| CG       | 0.10238         | 0.230882        | -1.255      |
| CT       | 0.19831         | 0.235709        | -0.189      |
| GT       | 0.10012         | 0.131489        | -0.313      |

Table 4: Estimated genotype frequencies (per 1000bp) from a simulation with 100 million sites at exactly 3-fold coverage.

| Genotype | Simulated freq. | Estimated freq. with true error rates | Exp-Obs/Exp          |
|----------|-----------------|---------------------------------------|----------------------|
| AC       | 9.94e-05        | 9.67491e-05                           | 0.026669014084507    |
| AG       | 0.000193        | 0.000178968                           | 0.0727046632124353   |
| AT       | 9.79e-05        | 9.88342e-05                           | -0.00954239019407561 |
| CG       | 9.58e-05        | 9.81046e-05                           | -0.0240563674321503  |
| CT       | 0.000197        | 0.000211775                           | -0.07500000000000001 |
| GT       | 9.77e-05        | 0.000102151                           | -0.0455578300921188  |

Table 5: Genotype frequency estimates for 3x simulated coverage when true error rates are given.

| Cov. | AC      | AG      | AT      | CG      | CT      | GT      |
|------|---------|---------|---------|---------|---------|---------|
| 1    | 1.99e-4 | 7.38e-4 | 9.21e-5 | 2.66e-4 | 6.13e-4 | 2.00e-4 |
| 2    | 1.12e-4 | 2.00e-4 | 8.03e-5 | 9.77e-5 | 2.48e-4 | 9.92e-5 |
| 3    | 9.34e-5 | 2.06e-4 | 1.00e-4 | 1.03e-4 | 1.97e-4 | 1.03e-4 |

Table 6: Genotype frequency estimates for 1-3x simulated average coverage. In contrast to the fixed coverage in the previous simulations, the simulated coverage follows a poisson distribution. Each simulation encompasses 10 million simulated sites, including sites that had no coverage.

| Cov. | AC     | AG     | AT     | CG     | CT     | GT     | ref.bias |
|------|--------|--------|--------|--------|--------|--------|----------|
| 3    | 0.1071 | 0.2018 | 0.0989 | 0.094  | 0.1988 | 0.104  | 0.5511   |
| 4    | 0.0983 | 0.1951 | 0.1047 | 0.1017 | 0.199  | 0.098  | 0.5494   |
| 5    | 0.0983 | 0.1975 | 0.0975 | 0.0969 | 0.1965 | 0.1011 | 0.5461   |
| 6    | 0.096  | 0.203  | 0.0977 | 0.0977 | 0.1991 | 0.0996 | 0.5498   |
| 7    | 0.0993 | 0.1914 | 0.0976 | 0.1003 | 0.1969 | 0.0972 | 0.5464   |
| 8    | 0.0997 | 0.1981 | 0.0993 | 0.0992 | 0.201  | 0.0998 | 0.5475   |
| 9    | 0.1027 | 0.1996 | 0.0977 | 0.105  | 0.2007 | 0.097  | 0.5510   |
| 10   | 0.0958 | 0.2    | 0.0991 | 0.1047 | 0.2023 | 0.0966 | 0.5515   |
| 12   | 0.0976 | 0.2029 | 0.0985 | 0.0987 | 0.1966 | 0.0995 | 0.5508   |
| 15   | 0.0962 | 0.1955 | 0.0966 | 0.1    | 0.2036 | 0.1045 | 0.5501   |
| 17   | 0.1018 | 0.1918 | 0.0966 | 0.0953 | 0.202  | 0.0966 | 0.5503   |
| 20   | 0.1019 | 0.1963 | 0.0992 | 0.1039 | 0.1928 | 0.0958 | 0.5485   |
| 25   | 0.0964 | 0.2025 | 0.0946 | 0.0986 | 0.2072 | 0.1016 | 0.5488   |
| 30   | 0.0996 | 0.2049 | 0.1047 | 0.1009 | 0.1997 | 0.1044 | 0.5514   |

Table 7: Simulated genotype frequencies with reference bias (per 1000bp).

| Cov. | AC        | AG       | AT        | CG        | CT       | GT        | ref.bias  |
|------|-----------|----------|-----------|-----------|----------|-----------|-----------|
| 3    | 1         | 1        | 1         | 1         | 1        | 1         | 0.95417   |
| 4    | 1         | 1        | 1         | 1         | 1        | 1         | 0.953826  |
| 5    | 1         | 1        | 1         | 1         | 1        | 1         | 0.956578  |
| 6    | 1         | 1        | 1         | 1         | 1        | 1         | 0.958906  |
| 7    | 1         | 1        | 1         | 1         | 1        | 1         | 0.958269  |
| 8    | 1         | 1        | 1         | 1         | 1        | 1         | 0.953793  |
| 9    | 1         | 1        | 1         | 1         | 1        | 1         | 0.950293  |
| 10   | 0.103956  | 0.251935 | 0.107054  | 0.115078  | 0.252771 | 0.104944  | 0.608715  |
| 12   | 0.0993383 | 0.22121  | 0.0997244 | 0.101436  | 0.21645  | 0.102138  | 0.5730837 |
| 15   | 0.0977169 | 0.202107 | 0.0976777 | 0.100955  | 0.210079 | 0.104663  | 0.558126  |
| 17   | 0.101805  | 0.197107 | 0.0978276 | 0.096013  | 0.203464 | 0.0969439 | 0.5546397 |
| 20   | 0.101403  | 0.198897 | 0.0989341 | 0.104611  | 0.195179 | 0.0956663 | 0.5505485 |
| 25   | 0.0970535 | 0.201382 | 0.0935319 | 0.0976879 | 0.20715  | 0.101026  | 0.549275  |
| 30   | 0.0996463 | 0.20537  | 0.104621  | 0.101775  | 0.202138 | 0.104083  | 0.5518523 |

Table 8: Estimated genotype frequencies (per 1000bp) and reference bias from simulations with reference bias (see Table 7). Frequencies of 1/1000bp correspond to the initial values for the optimization procedure and indicate that the algorithm did not converge.

| Cov. | AC        | AG       | AT        | CG        | CT       | GT        | ref.bias     |
|------|-----------|----------|-----------|-----------|----------|-----------|--------------|
| 3    | 1         | 1        | 1         | 1         | 1        | 1         | 0.953438     |
| 4    | 1         | 1        | 1         | 1         | 1        | 1         | 0.953484     |
| 5    | 1         | 1        | 1         | 1         | 1        | 1         | 0.956395     |
| 6    | 1         | 1        | 1         | 1         | 1        | 1         | 0.958075     |
| 7    | 1         | 1        | 1         | 1         | 1        | 1         | 0.956719     |
| 8    | 1         | 1        | 1         | 1         | 1        | 1         | 0.95392      |
| 9    | 0.103322  | 0.237223 | 0.0982436 | 0.104155  | 0.234996 | 0.103418  | 0.5754379    |
| 10   | 0.105007  | 0.207003 | 0.0977101 | 0.103477  | 0.22399  | 0.103373  | 0.5405103    |
| 12   | 0.10596   | 0.208124 | 0.0997445 | 0.0944469 | 0.20766  | 0.100264  | 0.518081     |
| 15   | 0.100901  | 0.20544  | 0.100627  | 0.0985946 | 0.197782 | 0.102163  | 0.50840239   |
| 17   | 0.10114   | 0.202382 | 0.0990932 | 0.0991423 | 0.202261 | 0.0962275 | 0.50315541   |
| 20   | 0.0986462 | 0.194231 | 0.102811  | 0.0999103 | 0.200908 | 0.103067  | 0.5000655172 |
| 25   | 0.104676  | 0.19986  | 0.0975324 | 0.0960198 | 0.201889 | 0.0984695 | 0.50172859   |
| 30   | 0.0975958 | 0.204819 | 0.10192   | 0.0974037 | 0.201259 | 0.0976113 | 0.50130228   |

Table 9: Estimated genotype frequencies (per 1000bp) and reference bias from simulations without reference bias (see Table 2). Simulations included no reference bias ( $r = 0.50$ ), but fluctuated between 0.498-0.502 due to the use of a pseudo random number generator.

| Genotype | Previous estimates | Current estimates | Exp-Obs/Exp |
|----------|--------------------|-------------------|-------------|
| AC       | 0.02637483448      | 0.0266535         | -0.0106     |
| AG       | 0.08703966695      | 0.0871984         | -0.0018     |
| AT       | 0.02642543445      | 0.0267161         | -0.0110     |
| CG       | 0.02333611154      | 0.0235279         | -0.0082     |
| CT       | 0.08398376852      | 0.0839987         | -0.0002     |
| GT       | 0.02822805388      | 0.028621          | -0.0139     |

Table 10: Vindija 33.19: previous and new genotype frequency estimates for 30x chromosome 21. Previous estimates were based on an error rates derived from comparing Vindija 33.19 sequences to the Altai Neandertal genotypes, while the new procedure co-estimates the error. Genotype frequencies are given per 1000bp.

| Cov. | AC        | AG        | AT         | CG        | CT        | GT        |
|------|-----------|-----------|------------|-----------|-----------|-----------|
| 1    | 0.156481  | 1         | 0.099432   | 0.181886  | 1         | 0.148702  |
| 2    | 0.0235957 | 0.0915316 | 0.00995462 | 0.0212318 | 0.0902833 | 0.0243273 |
| 3    | 0.0194142 | 0.0793266 | 0.015004   | 0.0183244 | 0.0831413 | 0.0229132 |
| 4    | 0.0230869 | 0.0873542 | 0.0164465  | 0.0204864 | 0.0896604 | 0.0222243 |
| 5    | 0.022984  | 0.0841431 | 0.017246   | 0.0208929 | 0.0846063 | 0.0221146 |
| 6    | 0.0225169 | 0.0834912 | 0.016566   | 0.0198478 | 0.0836662 | 0.022483  |
| 7    | 0.0222535 | 0.0854938 | 0.0175251  | 0.0195863 | 0.0812381 | 0.022945  |
| 8    | 0.0218176 | 0.087055  | 0.0177506  | 0.0197764 | 0.0823211 | 0.0221323 |
| 9    | 0.0228057 | 0.0861142 | 0.0181263  | 0.0209766 | 0.0837547 | 0.0230667 |
| 10   | 0.0220717 | 0.0843099 | 0.0190784  | 0.0205518 | 0.0859023 | 0.0233493 |
| 12.5 | 0.0238188 | 0.0871949 | 0.0201923  | 0.0209605 | 0.0845151 | 0.0239949 |
| 15   | 0.0237837 | 0.0878583 | 0.020731   | 0.0214662 | 0.0845611 | 0.0245654 |
| 17.5 | 0.0247929 | 0.0860958 | 0.0219419  | 0.0216504 | 0.0842108 | 0.0253737 |
| 20   | 0.0241059 | 0.0887325 | 0.0234373  | 0.0222888 | 0.0844751 | 0.0255594 |
| 25   | 0.0260217 | 0.0867229 | 0.0250622  | 0.0230925 | 0.0845706 | 0.0275897 |
| 30   | 0.0266535 | 0.0871984 | 0.0267161  | 0.0235279 | 0.0839987 | 0.028621  |

Table 11: Estimated genotype frequencies (per 1000bp) for subsampled Vindija 33.19 data and full data (30-fold coverage) for Chromosome 21.

| Cov. | AC        | AG        | AT        | CG        | CT        | GT        | ref.bias. |
|------|-----------|-----------|-----------|-----------|-----------|-----------|-----------|
| 1    | 1         | 1         | 1         | 1         | 1         | 1         | 0.488789  |
| 2    | 1         | 1         | 1         | 1         | 1         | 1         | 0.483124  |
| 3    | 1         | 1         | 1         | 1         | 1         | 1         | 0.482451  |
| 4    | 1         | 1         | 1         | 1         | 1         | 1         | 0.483107  |
| 5    | 1         | 1         | 1         | 1         | 1         | 1         | 0.483965  |
| 6    | 1         | 1         | 1         | 1         | 1         | 1         | 0.484572  |
| 7    | 1         | 1         | 1         | 1         | 1         | 1         | 0.484614  |
| 8    | 1         | 1         | 1         | 1         | 1         | 1         | 0.484388  |
| 9    | 1         | 1         | 1         | 1         | 1         | 1         | 0.48411   |
| 10   | 1         | 1         | 1         | 1         | 1         | 1         | 0.48357   |
| 12.5 | 0.0254813 | 0.102948  | 0.0211019 | 0.0233485 | 0.0974866 | 0.0260767 | 0.0780759 |
| 15   | 0.0250461 | 0.095778  | 0.0220548 | 0.0220069 | 0.0927085 | 0.0257213 | 0.0641697 |
| 17.5 | 0.0255528 | 0.0917879 | 0.0226941 | 0.0221606 | 0.0896427 | 0.0262666 | 0.055925  |
| 20   | 0.026011  | 0.0911584 | 0.0243382 | 0.0229291 | 0.0882428 | 0.0274094 | 0.0526592 |
| 25   | 0.0265753 | 0.0896112 | 0.0260777 | 0.0234638 | 0.0872355 | 0.0283603 | 0.0495509 |
| 30   | 0.0271757 | 0.0892411 | 0.0278416 | 0.0238781 | 0.086252  | 0.0291206 | 0.0471163 |

Table 12: Estimated genotype frequencies (per 1000bp) and reference bias for subsampled Vindija 33.19 data and full data (30-fold coverage) for Chromosome 21.

| Genotypes      | 1x       | 2x       | 3x       | 4x       | 5x       | 6x       | 7x       | 8x       | 9x       | 10x      | 12.5x    | 15x      | 17.5x    | 20x      | 25x      |
|----------------|----------|----------|----------|----------|----------|----------|----------|----------|----------|----------|----------|----------|----------|----------|----------|
| 0/0/0/1        | 5152     | 63       | 94       | 180      | 222      | 247      | 284      | 306      | 313      | 318      | 303      | 259      | 228      | 194      | 130      |
| 0/0:1/1        | 99102    | 84857    | 55902    | 34348    | 20669    | 12343    | 7623     | 4773     | 3022     | 1981     | 784      | 370      | 204      | 122      | 43       |
| 0/0:1/2        | 8        | 0        | 0        | 0        | 1        | 0        | 0        | 0        | 0        | 0        | 0        | 0        | 0        | 0        | 0        |
| 0/1:0/0        | 1711     | 2542     | 2632     | 2469     | 2230     | 1975     | 1748     | 1559     | 1362     | 1191     | 892      | 687      | 544      | 404      | 203      |
| 0/1:1/1        | 19       | 15       | 13       | 8        | 8        | 5        | 4        | 4        | 3        | 3        | 2        | 1        | 1        | 0        | 0        |
| 0/1:1/2        | 2        | 0        | 0        | 0        | 0        | 0        | 0        | 0        | 0        | 0        | 0        | 0        | 0        | 0        | 0        |
| 1/1:0/0        | 197      | 192      | 149      | 108      | 89       | 64       | 51       | 49       | 50       | 51       | 45       | 39       | 37       | 28       | 11       |
| 1/1:1/2        | 7        | 0        | 0        | 0        | 0        | 0        | 0        | 1        | 1        | 1        | 1        | 1        | 2        | 2        | 2        |
| 1/2:0/0        | 0        | 1        | 2        | 1        | 1        | 1        | 1        | 0        | 0        | 1        | 1        | 0        | 0        | 0        | 0        |
| 1/2:0/1        | 0        | 0        | 0        | 1        | 1        | 1        | 1        | 2        | 2        | 2        | 2        | 2        | 1        | 0        | 2        |
| 1/2:1/1        | 9        | 12       | 15       | 19       | 18       | 19       | 20       | 23       | 24       | 25       | 26       | 23       | 19       | 18       | 6        |
| concordant 0/0 | 14054746 | 19237587 | 21245357 | 22061259 | 22419936 | 22585939 | 22664220 | 22703546 | 22723853 | 22735585 | 22747418 | 22751474 | 22753357 | 22754464 | 22755575 |
| concordant 0/1 | 1845     | 2468     | 2936     | 3339     | 3711     | 4039     | 4308     | 4535     | 4754     | 4940     | 5261     | 5471     | 5616     | 5760     | 5964     |
| concordant 1/1 | 21578    | 29995    | 33441    | 35026    | 35754    | 36169    | 36402    | 36508    | 36612    | 36681    | 36801    | 36897    | 36981    | 37040    | 37159    |
| concordant 1/2 | 0        | 0        | 0        | 1        | 3        | 4        | 5        | 6        | 6        | 6        | 5        | 9        | 14       | 16       | 26       |
| discordant 0/1 | 1        | 0        | 0        | 2        | 2        | 1        | 1        | 1        | 1        | 1        | 2        | 4        | 3        | 2        | 0        |
| discordant 1/1 | 68       | 53       | 57       | 37       | 25       | 17       | 15       | 16       | 14       | 16       | 22       | 23       | 17       | 11       | 6        |

Table 13: Comparison of called genotypes in Vindija 33.19 subsamples to 30x calls. Genotypes column give the combination of genotypes in order 30x:subsample. Discordant genotypes list the events where the state matched, but the called alleles differed.



| Genotypes      | 1x      | 2x       | 3x       | 4x       | 5x       | 6x       | 7x       | 8x       | 9x       | 10x      | 12.5x    | 15x      | 17.5x    | 20x      | 25x      |
|----------------|---------|----------|----------|----------|----------|----------|----------|----------|----------|----------|----------|----------|----------|----------|----------|
| 0/0/0/1        | 9       | 1        | 1        | 0        | 0        | 1        | 1        | 2        | 2        | 1        | 0        | 1        | 1        | 1        | 0        |
| 0/0:1/1        | 1515    | 1878     | 1299     | 806      | 463      | 290      | 169      | 114      | 73       | 40       | 13       | 3        | 0        | 0        | 0        |
| 0/1:0/0        | 266     | 774      | 735      | 628      | 528      | 411      | 332      | 270      | 246      | 204      | 134      | 87       | 52       | 29       | 5        |
| 0/1:1/1        | 1       | 0        | 0        | 0        | 0        | 0        | 0        | 0        | 0        | 0        | 0        | 0        | 0        | 0        | 0        |
| 1/1:0/0        | 8       | 7        | 4        | 5        | 3        | 0        | 0        | 0        | 0        | 0        | 0        | 0        | 0        | 0        | 0        |
| 1/1:0/1        | 0       | 0        | 0        | 0        | 0        | 0        | 0        | 1        | 1        | 0        | 0        | 0        | 0        | 0        | 0        |
| 1/2:1/1        | 0       | 3        | 6        | 5        | 4        | 3        | 2        | 3        | 3        | 2        | 1        | 1        | 1        | 1        | 0        |
| concordant 0/0 | 4298057 | 13965648 | 17863618 | 20021659 | 21188632 | 21822227 | 22167988 | 22364540 | 22483197 | 22557762 | 22653561 | 22695379 | 22717659 | 22730345 | 22742667 |
| concordant 0/1 | 217     | 694      | 767      | 916      | 1132     | 1447     | 1847     | 2225     | 2589     | 2946     | 3702     | 4254     | 4641     | 4941     | 5321     |
| concordant 1/1 | 5573    | 20989    | 27162    | 30751    | 32771    | 33982    | 34655    | 35098    | 35375    | 35587    | 35903    | 36096    | 36234    | 36313    | 36450    |
| concordant 1/2 | 0       | 0        | 0        | 1        | 1        | 2        | 2        | 2        | 3        | 4        | 4        | 5        | 9        | 10       | 10       |
| discordant 1/1 | 1       | 2        | 4        | 2        | 1        | 0        | 0        | 0        | 0        | 0        | 0        | 0        | 0        | 0        | 0        |

Table 14: Comparison of called genotypes of at least GQ30 in Vindija 33.19 subsamples to 30x calls. Labels as in Table 13.

| Genotypes      | 1x  | 2x      | 3x      | 4x      | 5x      | 6x       | 7x       | 8x       | 9x       | 10x      | 12.5x    | 15x      | 17.5x    | 20x      | 25x      |
|----------------|-----|---------|---------|---------|---------|----------|----------|----------|----------|----------|----------|----------|----------|----------|----------|
| 0/0/0/1        | 0   | 0       | 0       | 0       | 0       | 0        | 0        | 0        | 0        | 0        | 0        | 1        | 0        | 0        | 0        |
| 0/1/0/0        | 0   | 19      | 42      | 50      | 60      | 47       | 56       | 49       | 44       | 34       | 26       | 18       | 6        | 2        | 0        |
| 1/2:1/1        | 0   | 0       | 0       | 0       | 0       | 1        | 1        | 1        | 1        | 1        | 0        | 0        | 0        | 0        | 0        |
| concordant 0/0 | 748 | 1241358 | 3509091 | 6215502 | 9257342 | 12043092 | 14401637 | 16302760 | 17780674 | 18908590 | 20692904 | 21590412 | 22064492 | 22322058 | 22565822 |
| concordant 0/1 | 4   | 31      | 89      | 222     | 398     | 617      | 949      | 1272     | 1615     | 2030     | 2900     | 3586     | 4107     | 4490     | 5011     |
| concordant 1/1 | 4   | 1394    | 4170    | 7831    | 12069   | 16264    | 19988    | 23158    | 25644    | 27635    | 30965    | 32820    | 33917    | 34557    | 35347    |
| concordant 1/2 | 0   | 0       | 0       | 0       | 0       | 1        | 1        | 2        | 2        | 2        | 4        | 5        | 5        | 5        | 6        |

Table 15: Comparison of called genotypes of at least GQ50 in Vindija 33.19 subsamples to 30x calls. Labels as in Table 13.

| Genotype | Vindija 33.15 without ref.bias | Vindija33.15 with ref.bias |
|----------|--------------------------------|----------------------------|
| AC       | 0.0266134                      | 0.0287228                  |
| AG       | 0.0963167                      | 0.109077                   |
| AT       | 0.0244506                      | 0.0271335                  |
| CG       | 0.0233174                      | 0.0246703                  |
| CT       | 0.0962895                      | 0.110025                   |
| GT       | 0.0257977                      | 0.0272471                  |

Table 16: Vindija 33.15: genotype frequency estimates with and without reference bias. The estimated reference bias for the third column was 10.14% ( $r = 0.6014$ ). Genotype frequencies are given per 1000bp.

| GT Vi.33.15 | GT Vi.33.19 | -RB vs. -RB | RB vs. -RB | -RB vs. RB | RB vs. RB |
|-------------|-------------|-------------|------------|------------|-----------|
| 0/0         | 0/0         | 17461981    | 17461610   | 17461954   | 17461583  |
| 0/0         | 0/1         | 112         | 102        | 139        | 129       |
| 0/0         | 1/1         | 1           | 1          | 1          | 1         |
| 0/1         | 0/0         | 352         | 722        | 347        | 717       |
| 0/1         | 0/1         | 3785        | 3793       | 3790       | 3798      |
| 0/1         | 1/1         | 79          | 39         | 79         | 39        |
| 1/1         | 0/0         | 1           | 2          | 1          | 2         |
| 1/1         | 0/1         | 12          | 14         | 12         | 14        |
| 1/1         | 1/1         | 26117       | 26157      | 26117      | 26157     |
| 1/2         | 1/1         | 1           | 1          | 1          | 1         |
| 1/2         | 1/2         | 5           | 5          | 5          | 5         |

Table 17: Comparison of Vindija 33.19 and 33.15 chr21 genotypes with and without reference bias. The samples Vindija 33.19 and 33.15 have been found to originate from the same individual. The first two columns show the observed configuration of genotypes. The remaining columns show the counts of genotypes of each configuration observed when calling Vindija 33.15 and Vindija 33.19 with (RB) or without (-RB) taking reference bias into account. Parameter estimates for genotype frequencies with and without reference bias are listed in Tables 12 and 11, respectively, for Vindija 33.19 and in Table 16 for Vindija 33.15.

| Vi33.19 coverage | AC        | AG        | AT        | CG        | CT        | GT        |
|------------------|-----------|-----------|-----------|-----------|-----------|-----------|
| 0.9x             | 0.0195129 | 0.109353  | 0.0205452 | 0.0187133 | 0.11283   | 0.022431  |
| 1.0x             | 0.0193746 | 0.100528  | 0.0202986 | 0.0174671 | 0.101193  | 0.0219828 |
| 1.2x             | 0.0191059 | 0.092621  | 0.0208953 | 0.0169481 | 0.0982858 | 0.0200446 |
| 1.5x             | 0.0188508 | 0.0847961 | 0.0201072 | 0.016174  | 0.0860951 | 0.0185336 |
| 2.0x             | 0.0189877 | 0.0808416 | 0.0205732 | 0.0161658 | 0.0862022 | 0.0179353 |
| 30x*             | 0.0197930 | 0.065936  | 0.0205161 | 0.0195035 | 0.0646958 | 0.0203278 |

Table 18: Estimated genotype frequencies (per 1000bp) for subsampled Vindija 33.19 data and full data (30-fold coverage) for autosomal sites with at least 4-fold coverage. \* 30x coverage estimate is the average, weighted by chromosome size, of the previously published genotype frequencies.

| Vi33.19 coverage | AC        | AG        | AT        | CG        | CT        | GT        |
|------------------|-----------|-----------|-----------|-----------|-----------|-----------|
| Goyet            | 0.0167772 | 0.058848  | 0.0183608 | 0.0169625 | 0.0592227 | 0.0181386 |
| LesCottés        | 0.0195414 | 0.0562096 | 0.0269036 | 0.014648  | 0.0600958 | 0.0209159 |
| Mez2             | 0.017562  | 0.0569594 | 0.0176347 | 0.0175739 | 0.0576068 | 0.0180015 |
| Vindija87        | 0.0201796 | 0.0758009 | 0.0240558 | 0.0203436 | 0.0809328 | 0.022701  |
| Spy              | 0.031233  | 0.0893976 | 0.0394828 | 0.0264985 | 0.0949992 | 0.031182  |
| Loschbour 1x     | 0.0510422 | 0.19892   | 0.0425446 | 0.0373921 | 0.195768  | 0.0535498 |
| Loschbour 2x     | 0.0510101 | 0.201208  | 0.0409543 | 0.0388374 | 0.202462  | 0.052122  |
| Motala12         | 0.0549699 | 0.260431  | 0.0425594 | 0.0612579 | 0.259056  | 0.0556023 |
| Loschbour 22x*   | 0.05067   | 0.20966   | 0.04319   | 0.05325   | 0.20831   | 0.05103   |

Table 19: Estimated genotype frequencies (per 1000bp) for low-coverage archaic and modern human data on autosomes for sites with at least 4-fold coverage. \* Genome-wide average, weighted by chromosome sizes, of previous snpAD estimates.

| Parameter     | No mapability | map35_100      |
|---------------|---------------|----------------|
| depth         | 1.83309693    | 0.859994221    |
| fracMissing   | 0.44624482    | 0.728850233    |
| fracTwoOrMore | 0.55375518    | 0.271149767    |
| pi(A)         | 0.233486339   | 0.217336017    |
| pi(C)         | 0.245584846   | 0.262575431    |
| pi(G)         | 0.262368764   | 0.283677311    |
| pi(T)         | 0.258560051   | 0.236411241    |
| theta_MLE     | 0.00218729023 | 0.00123814321  |
| theta_C95_l   | 0.00177227373 | 0.000745217841 |
| theta_C95_u   | 0.00260230673 | 0.00173106857  |
| LL            | -241726.674   | -117295.226    |

Table 20: ATLAS' genome-wide estimates of  $\theta$  for Motala12 with and without mapability track.

## 3 Comparison to GATK and samtools

### 3.1 Altai Neandertal Chromosome 21

Previous analyses used GATK to call genotypes for the high-coverage Denisovan and Altai Neandertal genomes (Meyer *et al.*, 2012; Prüfer *et al.*, 2014). Both genomes were treated with an enzyme to remove most of the ancient DNA damage (Briggs *et al.*, 2010), leaving only the first and last two bases of sequences to carry elevated C to T exchanges.

To test whether an earlier version of snpAD improves the genotypes for these genomes, the calls of GATK were previously compared to those from snpAD for the Altai Neandertal chromosome 21 (Prüfer *et al.*, 2017). This chromosome contains an  $\approx 19$ Mb long region that appears nearly devoid of heterozygous sites. The presence of such regions in the genome of the Altai Neandertal indicates that the individuals parents were closely related (at the level of half-siblings), causing long regions of homozygosity in the offspring (Prüfer *et al.*, 2014). The comparison of snpAD and GATK showed that snpAD calls a significantly smaller fraction of heterozygous sites in the inbred region than GATK. Note that the inbred regions were discovered based on the GATK calls and are therefore expected to be biased in favor of low heterozygosity in these calls.

Repeating this analysis, the Altai chromosome 21 was re-genotyped with the latest snpAD version. As before, single and double stranded libraries were regarded separately. The software was otherwise run with default parameters. Both GATK and snpAD calls were filtered according to the minimal recommended filters. Table 21 shows that snpAD continues to call a significantly lower fraction of heterozygous sites in the inbred region, where few to no heterozygous sites are expected (Fisher’s exact test  $p < 2 \times 10^{-9}$ ).

MapDamage can process bam files to lower the quality of bases that may be affected by ancient DNA damage. To test whether this approach yields an improvement, the quality scores in the Altai chromosome 21 bam file were rescaled with mapDamage (version: 2.0.2-6-gdb9ad80) using the option `--single-stranded` followed by genotyping with GATK as described before (Prüfer *et al.*, 2014). The number of heterozygous sites called by GATK are lower after rescaling than without rescaling. Their distribution in inbred and non-inbred regions does not differ significantly between rescaled GATK calls and GATK calls based on sequences where T’s at the first or last two positions were masked ( $p > 0.6$ ). As for the non-rescaled GATK calls, snpAD calls show a significantly smaller fraction of heterozygous sites in inbred regions compared to the rescaled GATK calls ( $p < 4 \times 10^{-8}$ ; Table 21).



To test whether GATK calls could be improved by applying a genotype quality cutoff (QUAL field), I tested increasing cutoffs (steps of 10) until the number of rescaled GATK heterozygous sites for the inbred region were close to the number of snpAD calls. At  $QUAL \geq 590$ , GATK+mapDamage yielded 92 heterozygote calls ( $QUAL \geq 600$  yielded 90). However, this cutoff also led to a substantial decrease in called heterozygotes outside of the inbred region (GATK called 35% less heterozygotes compared to snpAD; see Table 21; Fisher’s exact test of ratios  $p = 0.004$ ). The difference between snpAD and GATK in called heterozygotes between inbred and non-inbred region can thus not be eliminated by applying quality cutoffs on GATK genotypes.

Genotype calls were also produced by running samtools (version: 1.3.1-21-g874baf3) followed by bcftools (version: 1.4) with the options ”-c” (consensus caller) or ”-m” (multiallelic caller). The samtools genotyping was run with and without quality score rescaling using mapDamage. All VCFs were filtered using the minimal recommended filters for the Altai Neandertal. No significant difference in the ratio of heterozygous calls within and outside of the inbred region was detected in comparison to snpAD, indicating a similar quality of calls.

| Genotyper                          | inbred | non-inbred | p-value to snpAD      |
|------------------------------------|--------|------------|-----------------------|
| snpAD                              | 91     | 2291       | -                     |
| GATK                               | 501    | 2689       | $< 2 \times 10^{-16}$ |
| GATK*                              | 206    | 2431       | $2 \times 10^{-9}$    |
| GATK+mapDamage                     | 191    | 2387       | $4 \times 10^{-8}$    |
| GATK+mapDamage ( $QUAL \geq 590$ ) | 92     | 1497       | $4 \times 10^{-3}$    |
| samtools (-c)                      | 96     | 2293       | 0.78                  |
| samtools (-m)                      | 84     | 2280       | 0.64                  |
| samtools+mapDamage (-c)            | 95     | 2298       | 0.82                  |
| samtools+mapDamage (-m)            | 88     | 2281       | 0.88                  |

Table 21: GATK and samtools vs. snpAD heterozygous calls within and outside of an autozygous region on Altai chromosome 21. The region spans bases chr21:17081807-35881807 in hg19 coordinates. Brackets after samtools give the option used for calling with bcftools. Column ”p-value” shows the result of a Fisher’s exact test of the inbred/non-inbred counts against the counts for snpAD. \* These calls for GATK were based on a modified input file in which T’s at the first and last two positions were masked (see also (Prüfer *et al.*, 2017)).

### 3.2 Vindija 33.19 Neandertal Chromosome 21

Due to the enzyme treatment, few erroneous C to T exchanges remain in the sequences of the high-coverage Altai Neandertal. In contrast, only a quarter of the high-coverage Vindija 33.19 Neandertal data come from enzyme treated libraries, resulting in common C to T exchanges in the majority of sequences. To test how the snpAD calls compare to those produced by other genotyper-software for this more challenging dataset, I ran samtools and GATK with and without mapDamage quality score rescaling on the chromosome 21 data of Vindija 33.19. MapDamage rescaling was run separately for the data of treated and untreated libraries using the option `--single-stranded`. All VCF files were restricted to sites that pass the recommended minimum filters for Vindija 33.19 (Prüfer *et al.*, 2017).

Table 22 shows the number of called heterozygous sites for all runs together with the transition/transversion (ts/tv) ratio of these sites. SnpAD yielded with 2.06 the lowest ts/tv ratio among all runs. Note that this value falls within the range of ts/tv ratios observed for GATK calls of 25 modern human genomes of diverse ancestry (1.95-2.17; A and B-panel from Meyer *et al.* (2012) and Prüfer *et al.* (2014)). For the remaining genotypers, the calls with mapDamage rescaling are consistently smaller in their ts/tv ratios than those without, indicating that mapDamage is reducing the influence of C to T exchanges. However, even after correction the ts/tv values fall outside of the range observed in present-day human genomes, suggesting that the calls still contain a large number of errors due to ancient DNA damage.

| Genotyper               | AC  | AG     | AT  | CG  | CT     | GT  | ts/tv  |
|-------------------------|-----|--------|-----|-----|--------|-----|--------|
| snpAD                   | 441 | 1638   | 335 | 390 | 1645   | 424 | 2.06   |
| GATK                    | 472 | 114789 | 370 | 406 | 115047 | 449 | 135.44 |
| GATK+mapDamage          | 472 | 8496   | 370 | 406 | 8703   | 449 | 10.13  |
| samtools (-c)           | 415 | 6188   | 287 | 376 | 6281   | 395 | 8.47   |
| samtools+mapDamage (-c) | 415 | 3927   | 288 | 376 | 3999   | 395 | 5.38   |
| samtools (-m)           | 414 | 4363   | 284 | 375 | 4380   | 390 | 5.98   |
| samtools+mapDamage (-m) | 414 | 3022   | 285 | 374 | 3018   | 391 | 4.13   |

Table 22: GATK and samtools vs. snpAD heterozygous calls on Vindija 33.19 chromosome 21. Shown are the number of heterozygous calls for each genotype. Column ts/tv gives the transition/transversion ratio. The ts/tv ratio of snpAD is significantly lower than those of all other genotypers (Fisher’s exact test on the ts and tv counts:  $p < 2.2 \times 10^{-16}$  for all pairwise tests)

## 4 Comparison to ATLAS

ATLAS 1.0 was downloaded on 2017-11-23 from the authors github page (rev. 9b2390c). Conserved regions were downloaded according to the authors instructions and modified to fit the coordinates in bam files:

```
cat original_hg19_UCNE_coord.bed |  
    sed -e 's/^chr//g' > hg19_UCNE_coord.bed
```

ATLAS was then run with the *recal* option using the following steps:

```
atlas task=estimatePMD bam=motala12.bam \  
    fasta=hg19_evan/whole_genome.fa \  
    length=25  
  
atlas task=recal bam=motala12.bam \  
    pmdFile=motala12_PMD_input_Empiric.txt \  
    regions=hg19_UCNE_coord.bed verbose  
  
atlas task=recalBAM bam=motala12.bam \  
    recal=motala12_recalibrationEM.txt \  
    pmdFile=motala12_PMD_input_Empiric.txt \  
    fasta=hg19_evan/whole_genome.fa \  
    withPMD maxOutQuality=42 verbose
```

The resulting recalibrated quality scores appeared to shift all quality scores to values less than 10:

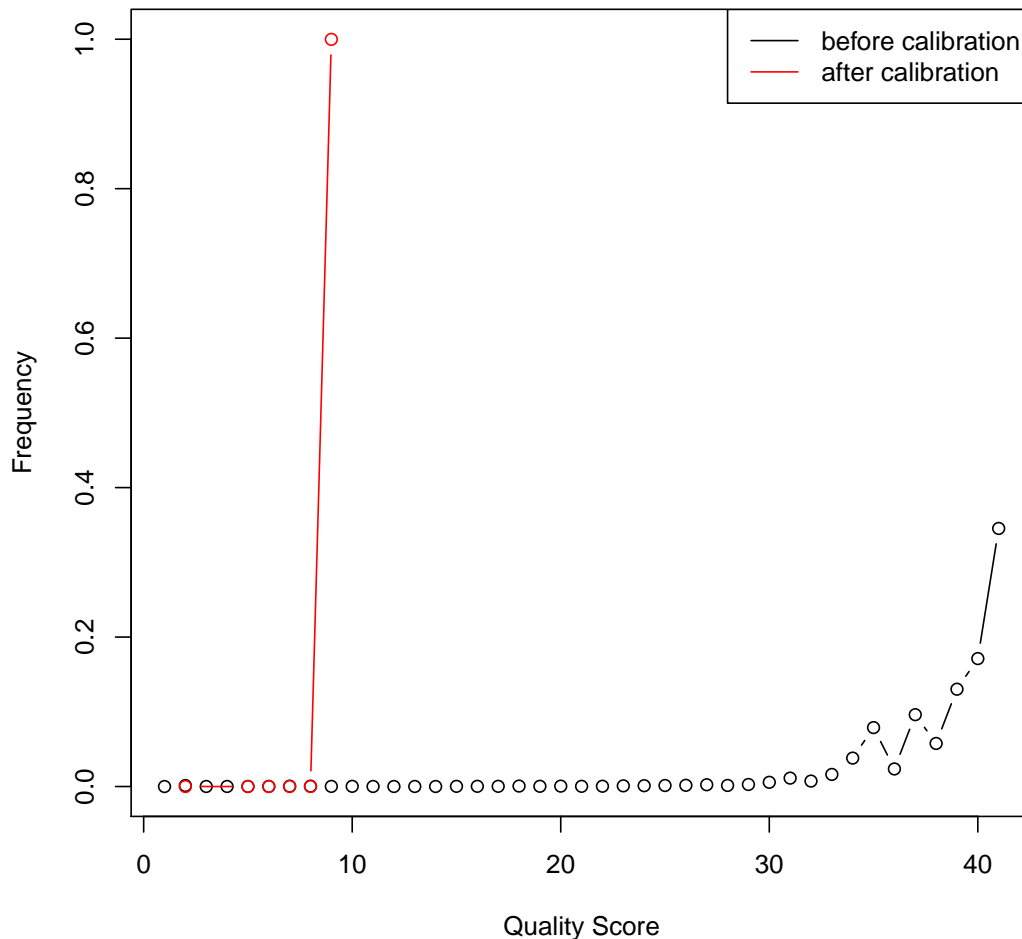

Running ATLAS with the *minDepth=2* option did not change the result.

A new version of ATLAS 1.0 was downloaded on 2018-03-15 (commit 49f1fea). PMD estimation was run with the command:

```
atlas task=estimatePMD \
      bam=motala12.bam \
      fasta=hg19_evan/whole_genome.fa \
      length=25
```

The command failed with the message "Error: Length mismatch!".

Using the previous estimates of the older ATLAS version for the *estimatePMD* step, the following commands were run:

```
atlas task=recal bam=motala12.bam \  
      pmdFile=motala12_PMD_input_Empiric.txt \  
      regions=hg19_UCNE_coord.bed verbose
```

```
atlas task=recalBAM bam=motala12.bam \  
      recal=motala12_recalibrationEM.txt \  
      pmdFile=motala12_PMD_input_Empiric.txt \  
      fasta=hg19_evan/whole_genome.fa withPMD \  
      maxOutQuality=42 verbose
```

The execution of *recalBAM* failed with the same message as before, but left an indexable recalibrated bam file with a more reasonable quality score distribution:

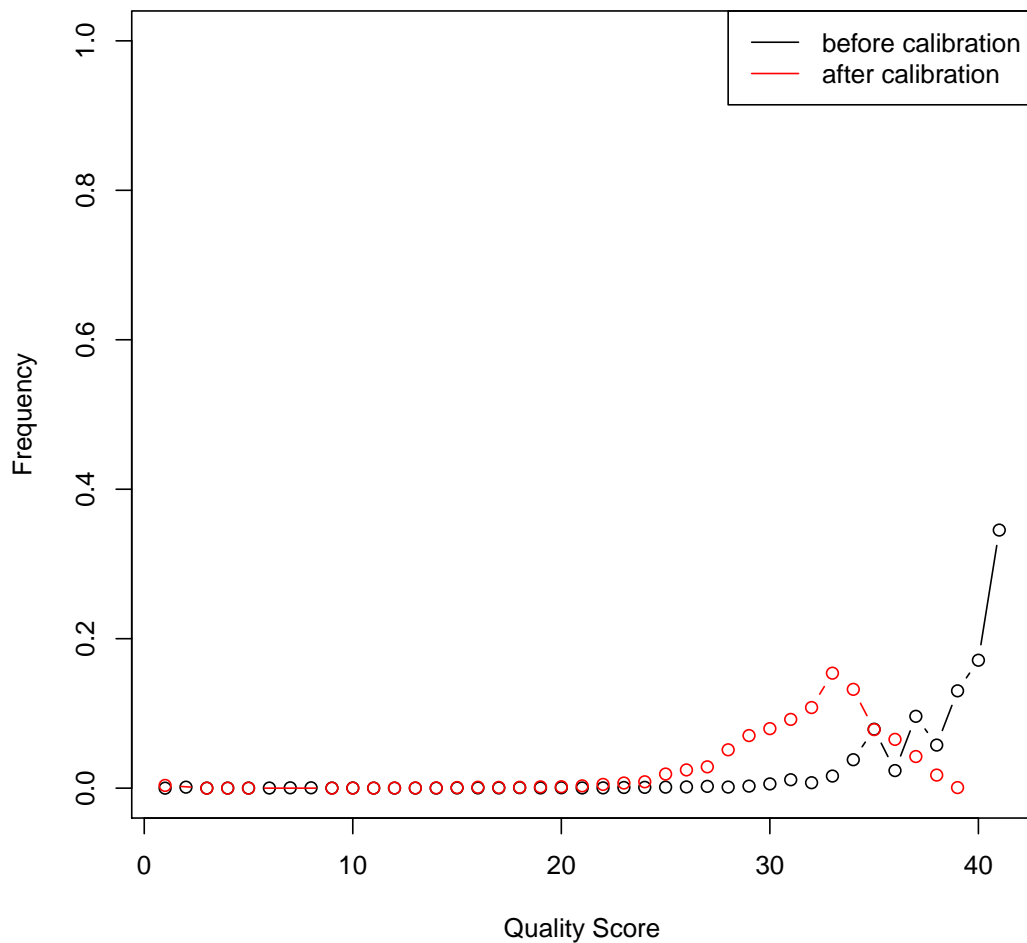

Genome-wide theta on the autosomes were estimated for all regions and for regions passing a 35mer mapability filter (map35\_100) that was used in the analysis of the Altai Neandertal and Vindija Neandertal, and for all snpAD estimates in this paper:

```
atlas task=estimateTheta bam=motala12.bam \  
      pmdFile=motala12_PMD_input_Empiric.txt \  
      recal=motala12_recalibrationEM.txt \  
      thetaGenomeWide limitChr=22 \  
      minDepth=2 verbose
```

```
atlas task=estimateTheta bam=motala12.bam \  
      pmdFile=motala12_PMD_input_Empiric.txt \  
      recal=motala12_recalibrationEM.txt \  
      thetaGenomeWide limitChr=22 \  
      regions=hs37m_filt35_99.bed.gz \  
      minDepth=2 verbose
```

The resulting estimates are shown in Table 20.

## References

- Briggs, A. W., Stenzel, U., Meyer, M., Krause, J., Kircher, M., and Pääbo, S. (2010). Removal of deaminated cytosines and detection of in vivo methylation in ancient DNA. *Nucleic Acids Research*, **38**(6), e87.
- Hajdinjak, M., Fu, Q., Hübner, A., Petr, M., Mafessoni, F., Grote, S., Skoglund, P., Narasimham, V., Rougier, H., Crevecoeur, I., Semal, P., Soressi, M., Talamo, S., Hublin, J.-J., Gušić, I., Kučan, Ž., Rudan, P., Golovanova, L. V., Doronichev, V. B., Posth, C., Krause, J., Korlević, P., Nagel, S., Nickel, B., Slatkin, M., Patterson, N., Reich, D., Prüfer, K., Meyer, M., Pääbo, S., and Kelso, J. (2018). Reconstructing the genetic history of late Neanderthals. *Nature*, page in press.
- Lazaridis, I., Patterson, N., Mittnik, A., Renaud, G., Mallick, S., Kirsanow, K., Sudmant, P. H., Schraiber, J. G., Castellano, S., Lipson, M., Berger, B., Economou, C., Bollongino, R., Fu, Q., Bos, K. I., Nordenfelt, S., Li, H., de Filippo, C., Prüfer, K., Sawyer, S., Posth, C., Haak, W., Hallgren, F., Fornander, E., Rohland, N., Delsate, D., Francken, M., Guinet, J.-M., Wahl, J., Ayodo, G., Babiker, H. A., Bailliet, G., Balanovska, E., Balanovsky, O., Barrantes, R., Bedoya, G., Ben-Ami, H., Bene, J., Berrada, F., Bravi, C. M., Brisighelli, F., Busby, G. B. J., Cali, F., Churnosov, M., Cole, D. E. C., Corach, D., Damba, L., van Driem, G., Dryomov, S., Dugoujon, J.-M., Fedorova, S. A., Gallego Romero, I., Gubina, M., Hammer, M., Henn, B. M., Hervig, T., Hodoglugil, U., Jha, A. R., Karachanak-Yankova, S., Khusainova, R., Khusnutdinova, E., Kittles, R., Kivisild, T., Klitz, W., Kučinskas, V., Kushniarevich, A., Laredj, L., Litvinov, S., Loukidis, T., Mahley, R. W., Melegh, B., Metspalu, E., Molina, J., Mountain, J., Näkkäläjärvi, K., Nesheva, D., Nyambo, T., Osipova, L., Parik, J., Platonov, F., Posukh, O., Romano, V., Rothhammer, F., Rudan, I., Ruizbakiev, R., Sahakyan, H., Sajantila, A., Salas, A., Starikovskaya, E. B., Tarekegn, A., Toncheva, D., Turdikulova, S., Uktveryte, I., Utevska, O., Vasquez, R., Villena, M., Voevoda, M., Winkler, C. A., Yepiskoposyan, L., Zalloua, P., Zemunik, T., Cooper, A., Capelli, C., Thomas, M. G., Ruiz-Linares, A., Tishkoff, S. A., Singh, L., Thangaraj, K., Vilems, R., Comas, D., Sukernik, R., Metspalu, M., Meyer, M., Eichler, E. E., Burger, J., Slatkin, M., Pääbo, S., Kelso, J., Reich, D., and Krause, J. (2014). Ancient human genomes suggest three ancestral populations for present-day Europeans. *Nature*, **513**(7518), 409–413.
- Meyer, M., Kircher, M., Gansauge, M.-T., Li, H., Racimo, F., Mallick, S., Schraiber, J. G., Jay, F., Prüfer, K., Filippo, C. d., Sudmant, P. H., Alkan, C., Fu, Q., Do, R., Rohland, N., Tandon, A., Siebauer, M., Green, R. E., Bryc, K., Briggs, A. W., Stenzel, U., Dabney, J., Shendure, J., Kitzman, J., Hammer, M. F., Shunkov, M. V., Derevianko, A. P., Patterson, N., Andrés, A. M., Eichler, E. E., Slatkin, M., Reich, D., Kelso, J., and Pääbo, S. (2012). A High-Coverage Genome Sequence from an Archaic Denisovan Individual. *Science*, **338**(6104), 222–226.
- Prüfer, K., Racimo, F., Patterson, N., Jay, F., Sankararaman, S., Sawyer, S., Heinze, A., Renaud, G., Sudmant, P. H., de Filippo, C., Li, H., Mallick, S., Dannemann, M., Fu, Q., Kircher, M., Kuhlwilm, M., Lachmann, M., Meyer, M., Ongyerth, M., Siebauer, M., Theunert, C., Tandon, A., Moorjani, P., Pickrell, J., Mullikin, J. C., Vohr, S. H., Green, R. E., Hellmann, I., Johnson, P. L. F., Blanche, H., Cann, H., Kitzman, J. O., Shendure, J., Eichler, E. E., Lein, E. S., Bakken, T. E., Golovanova, L. V., Doronichev, V. B., Shunkov, M. V., Derevianko, A. P., Viola, B., Slatkin, M., Reich, D., Kelso, J., and Pääbo, S. (2014). The complete genome sequence of a Neandertal from the Altai Mountains. *Nature*, **505**(7481), 43–49.
- Prüfer, K., de Filippo, C., Grote, S., Mafessoni, F., Korlević, P., Hajdinjak, M., Vernot, B., Skov, L., Hsieh, P., Peyrégne, S., Reher, D., Hopfe, C., Nagel, S., Maricic, T., Fu, Q., Theunert, C., Rogers, R., Skoglund, P., Chintalapati, M., Dannemann, M., Nelson, B. J., Key, F. M., Rudan, P., Kučan, Ž., Gušić, I., Golovanova, L. V., Doronichev, V. B., Patterson, N., Reich, D., Eichler, E. E., Slatkin, M., Schierup, M. H., Andrés, A. M., Kelso, J., Meyer, M., and Pääbo, S. (2017). A high-coverage Neandertal genome from Vindija Cave in Croatia. *Science (New York, N.Y.)*, **358**(6363), 655–658.
